# Supplementary material for: Porous Li4Ti5O12–TiO2 nanosheet arrays for high-performance lithium-ion batteries
Source: Royal Society of Chemistry journal article supplement (doi:10.1039/c5ta01054c), 2015-01-01
Supplement: c5ta01054c1.pdf [file c5ta01054c1.pdf]

Electronic Supplementary Material (ESI) for Journal of Materials Chemistry A.  
This journal is The Royal Society of Chemistry 2014

**Porous  $\text{Li}_4\text{Ti}_5\text{O}_{12}$ - $\text{TiO}_2$  nanosheet arrays for high-performance  
lithium-ion batteries**

Lin Gao, Shaohui Li, Dekang Huang, Yan Shen\* and Mingkui Wang\*

*Wuhan National Laboratory for Optoelectronics, Huazhong University of Science and  
Technology, Luoyu Road 1037, Wuhan 430074, P. R. China*

E-mail: [ciac\\_sheny@mail.hust.edu.cn](mailto:ciac_sheny@mail.hust.edu.cn); [mingkui.wang@mail.hust.edu.cn](mailto:mingkui.wang@mail.hust.edu.cn)

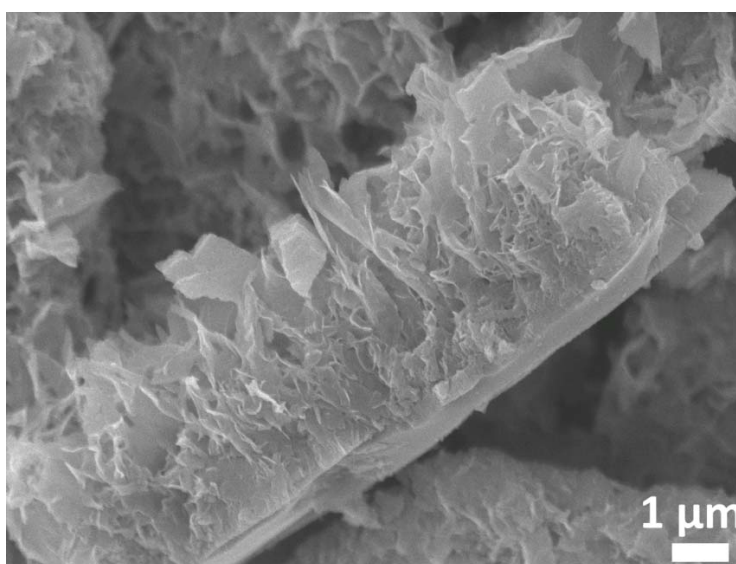

Figure S1. Cross-sectional SEM image of the  $\text{TiO}_2$  nanosheet array.

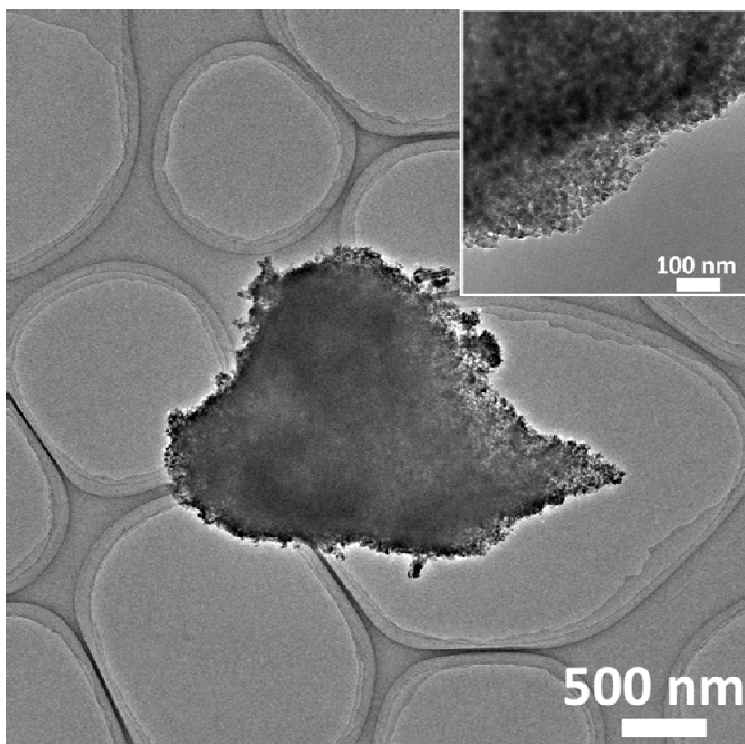

Figure S2. TEM image for an individual  $\text{TiO}_2$  nanosheet, the inset is the enlarged TEM image of the  $\text{TiO}_2$ .

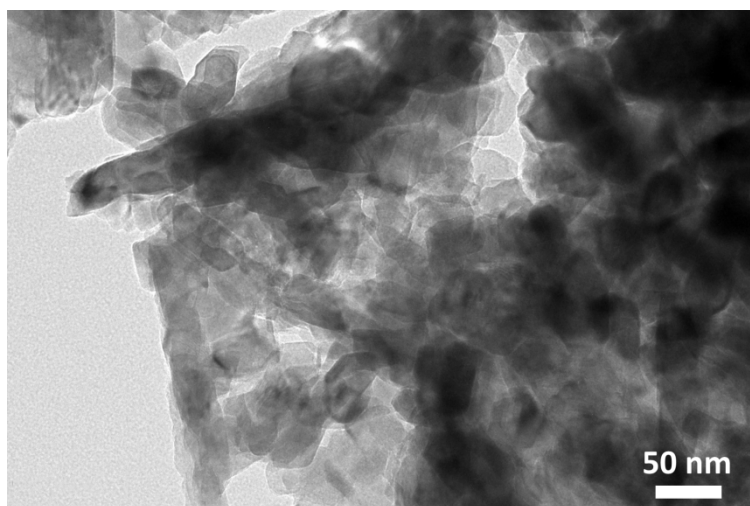

Figure S3. TEM image of the 0.5-LTO-TO-600 sample.

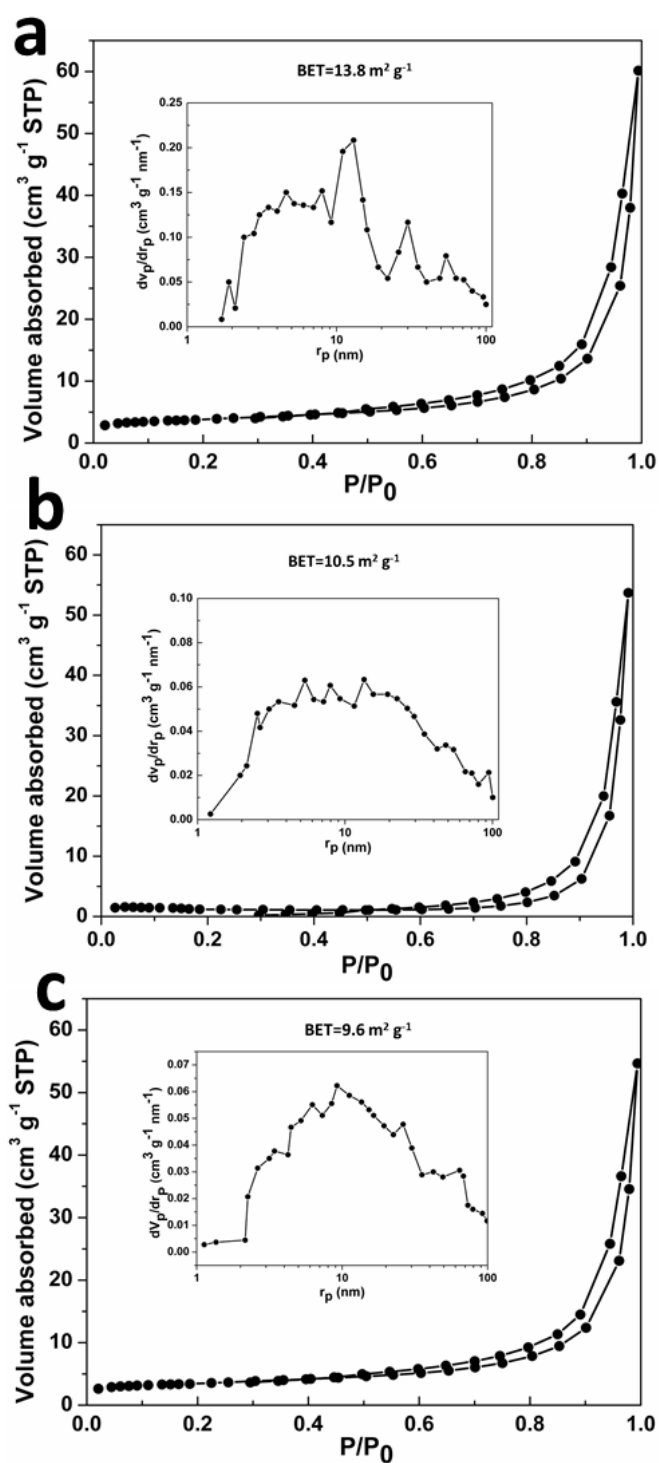

Figure S4.  $N_2$  adsorption-desorption isotherm of various samples (a) the 0.5-LTO-TO-600, (b) the 0.5-LTO-TO-700 and (c) the 1.0-LTO-TO-600. The inset shows the corresponding pore size distribution.

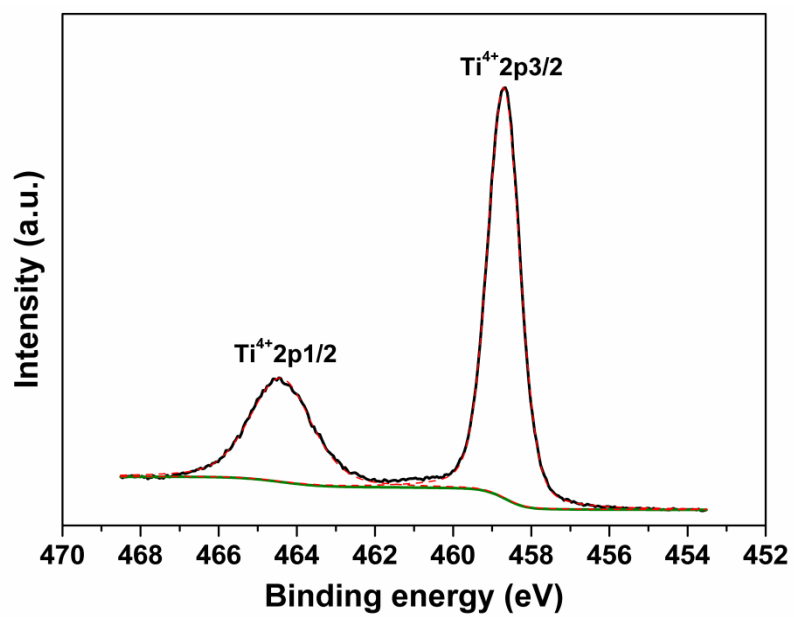

Figure S5. High resolution XPS spectrum for Ti2p of the 0.5-LTO-TO-600 sample.
